# Supplementary material for: Machine learning-constrained projection of bivariate hydrological drought magnitudes and socioeconomic risks
Source: Copernicus journal article supplement (doi:10.5194/hess-2023-181), 2023-09-06
Supplement: Supplementary file 1 [file hess-2023-181-supplement.pdf]

## Supplementary Information for

# Machine learning-constrained projection of bivariate hydrological drought magnitudes and socioeconomic risks

Rutong Liu<sup>1</sup>, Jiabo Yin<sup>1\*</sup>, Louise Slater<sup>2</sup>, Shengyu Kang<sup>1</sup>, Yuanhang Yang<sup>1</sup>, Pan Liu<sup>1</sup>, Jiali Guo<sup>3,4</sup>, Xihui Gu<sup>5</sup>, Aliaksandr Volchak<sup>6</sup>

<sup>1</sup>State Key Laboratory of Water Resources Engineering and Management, Wuhan University, Wuhan, Hubei, 430072, P.R. China

<sup>2</sup>School of Geography and the Environment, University of Oxford, Oxford, UK

<sup>3</sup>Engineering Research Center of Eco-environment in Three Gorges Reservoir Region, Ministry of Education, China Three Gorges University, Yichang, Hubei 443002, China

<sup>4</sup>College of Hydraulic and Environmental Engineering, China Three Gorges University, Yichang, Hubei 443002, China

<sup>5</sup>School of Environmental Studies, China University of Geosciences, Wuhan 430074, China

<sup>6</sup>Engineering Systems and Ecology Faculty, Brest State Technical University, Moskovskaya 267, 224017 Brest, Belarus

\*Correspondence: Jiabo Yin (jboyn@whu.edu.cn)

**Table S1. Classification of drought and threshold values of the drought events.**

| <b>Drought Classes</b> | <b>Drought Index (DI)</b> |
|------------------------|---------------------------|
| No Drought             | DI > -0.5                 |
| Mild Drought           | -1.0 < DI ≤ -0.5          |
| Moderate Drought       | -1.5 < DI ≤ -1.0          |
| Severe Drought         | -2.0 < DI ≤ -1.5          |
| Extreme Drought        | DI ≤ -2.0                 |

**Table S2. Seven candidate distributions to the marginal distributions of drought duration and severity.**

| <b>Candidate distributions</b> | <b>Probability density functions</b>                                                                                 |
|--------------------------------|----------------------------------------------------------------------------------------------------------------------|
| Gamma                          | $f(x) = \frac{x^{\alpha-1}}{\beta^\alpha \Gamma(\alpha)} e^{-\frac{x}{\beta}}$                                       |
| Generalized Extreme Value      | $f(x) = \exp \left\{ - \left[ 1 + \gamma \left( \frac{x - \mu}{\sigma} \right) \right]^{-\frac{1}{\gamma}} \right\}$ |
| Inverse Gaussian               | $f(x) = \frac{\sqrt{\lambda}}{\sqrt{2\pi x^3}} \exp \left\{ - \frac{\lambda(x - \mu)^2}{2\mu^2 x} \right\}$          |
| Log-normal                     | $f(x) = \frac{1}{x\sigma\sqrt{2\pi}} \exp \left\{ - \frac{(\ln x - \mu)^2}{2\sigma^2} \right\}$                      |
| Normal                         | $f(x) = \frac{1}{\sigma\sqrt{2\pi}} \exp \left\{ - \frac{(x - \mu)^2}{2\sigma^2} \right\}$                           |
| Pearson type-III               | $f(x) = \frac{\beta^\alpha}{\Gamma(\alpha)} (x - a_0)^{\alpha-1} e^{-\beta(x-a_0)}$                                  |
| Weibull                        | $f(x) = \frac{k}{\lambda} \left( \frac{x}{\lambda} \right)^{k-1} e^{-\left( \frac{x}{\lambda} \right)^k}$            |
