# Supplementary material for: Machine learning-constrained projection of bivariate hydrological drought magnitudes and socioeconomic risks
Source: Copernicus journal article supplement (doi:10.5194/hess-2023-181), 2023-09-06
Supplement: Supplementary file [file hess-2023-181-AC1-supplement.pdf]

## References

- Arsenault, R., Essou, G. R., and Brissette, F. P.: Improving hydrological model simulations with combined multi-input and multimodel averaging frameworks, *Journal of Hydrologic Engineering*, 22, 04016066, 2017.
- Cai, X., Zeng, R., Kang, W. H., Song, J., and Valocchi, A. J.: Strategic Planning for Drought Mitigation under Climate Change, *Journal of Water Resources Planning and Management*, 141, 04015004, [https://doi.org/10.1061/\(ASCE\)WR.1943-5452.0000510](https://doi.org/10.1061/(ASCE)WR.1943-5452.0000510), 2015.
- Chang, J., Guo, A., Wang, Y., Ha, Y., Zhang, R., Xue, L., and Tu, Z.: Reservoir operations to mitigate drought effects with a hedging policy triggered by the drought prevention limiting water level, *Water Resources Research*, 55, 904–922, 2019.
- Duan, Q., Sorooshian, S., and Gupta, V.: Effective and efficient global optimization for conceptual rainfall-runoff models, , 28, 1015–1031, 1992.
- Hu, C., Guo, S., Xiong, L., and Peng, D.: A modified Xinanjiang model and its application in northern China, *Hydrology Research*, 36, 175–192, 2005.
- Piao, S., Ciais, P., Huang, Y., Shen, Z., Peng, S., Li, J., Zhou, L., Liu, H., Ma, Y., Ding, Y., Friedlingstein, P., Liu, C., Tan, K., Yu, Y., Zhang, T., and Fang, J.: The impacts of climate change on water resources and agriculture in China, *Nature*, 467, 43–51, <https://doi.org/10.1038/nature09364>, 2010.
- Pörtner, H.-O., Roberts, D. C., Poloczanska, E. S., Mintenbeck, K., Tignor, M., Alegría, A., Craig, M., Langsdorf, S., Löschke, S., and Möller, V.: IPCC, 2022: Summary for policymakers, 2022.
- Ren-Jun, Z.: The Xinanjiang model applied in China, *Journal of hydrology*, 135, 371–381, 1992.
- Sohn, J. A., Saha, S., and Bauhus, J.: Potential of forest thinning to mitigate drought stress: A meta-analysis, *Forest Ecology and Management*, 380, 261–273, <https://doi.org/10.1016/j.foreco.2016.07.046>, 2016.
- Tian, Y., Xu, Y.-P., and Zhang, X.-J.: Assessment of Climate Change Impacts on River High Flows through Comparative Use of GR4J, HBV and Xinanjiang Models, *Water Resources Management*, 27, 2871–2888, 2013.
- Wilhite, D. A., Svoboda, M. D., and Hayes, M. J.: Understanding the complex impacts of drought: A key to enhancing drought mitigation and preparedness, *Water Resour Manage*, 21, 763–774, <https://doi.org/10.1007/s11269-006-9076-5>, 2007.
- Xiao-jun, W., Jian-yun, Z., Shahid, S., ElMahdi, A., Rui-min, H., Zhen-xin, B., and Ali, M.: Water resources management strategy for adaptation to droughts in China, *Mitig Adapt Strateg Glob Change*, 17, 923–937, <https://doi.org/10.1007/s11027-011-9352-4>, 2012.
